# Supplementary material for: Identification of hub necroptosis-related lncRNAs for prognosis prediction of esophageal carcinoma
Source: publisher site journal article supplement (doi:10.18632/aging.204763), 2023-06-01
Supplement: Supplementary file [file aging-v15i11-204763-supplementary-material-SD6.pdf]

**Supplementary Table 6. Evaluation of 6-NRL signature based on time-dependent ROC and C-index.**

| Models              | 1 years | 3 years | 5 years | <i>p</i> -value | C-index[95%(CI)]    | HR[95%(low, high)]   | <i>p</i> -value | PMID     |
|---------------------|---------|---------|---------|-----------------|---------------------|----------------------|-----------------|----------|
| NRLs signature      | 0.784   | 0.827   | 0.764   | <0.001          | 0.759[0.721, 0.797] | 1.322(1.158-1.510)   | <0.001          | -        |
| Song-JH signature   | 0.593   | 0.729   | 0.683   | 0.015           | 0.615[0.584, 0.646] | 2.212(1.437-3.404)   | <0.001          | 34291083 |
| Ye-JC signature     | 0.611   | 0.704   | 0.709   | 0.006           | 0.599[0.569, 0.629] | 2.251(1.353-3.747)   | 0.002           | 34764976 |
| Zhao-MN signature   | 0.561   | 0.701   | 0.736   | 0.030           | 0.574[0.545, 0.603] | 1.909(1.018-3.581)   | 0.044           | 35371305 |
| Yao-JN signature    | 0.591   | 0.700   | 0.659   | 0.022           | 0.584[0.555, 0.613] | 2.018(1.201-3.390)   | 0.008           | 34926275 |
| Hu-ZN signature     | 0.573   | 0.700   | 0.780   | 0.028           | 0.552[0.524, 0.580] | 1.910(0.818-4.460)   | 0.135           | 34840568 |
| Yi-LL signature     | 0.747   | 0.688   | 0.627   | 0.002           | 0.659[0.626, 0.692] | 1.651(1.298-2.101)   | <0.001          | 32810627 |
| Zhao-FC signature   | 0.610   | 0.688   | 0.666   | 0.286           | 0.573[0.544, 0.602] | 2.430(0.750-7.872)   | 0.139           | 35309940 |
| Wang-L signature    | 0.588   | 0.678   | 0.740   | 0.023           | 0.624[0.593, 0.655] | 1.640(1.253-2.146)   | <0.001          | 34257547 |
| Zhao-FC signature   | 0.555   | 0.676   | 0.691   | 0.009           | 0.542[0.515, 0.569] | 2.238(0.986-5.077)   | 0.054           | 35646892 |
| Xiong-K signature   | 0.645   | 0.670   | 0.611   | 0.011           | 0.611[0.580, 0.642] | 2.632(1.533-4.517)   | <0.001          | 35497331 |
| Zhuang-WT signature | 0.652   | 0.669   | 0.579   | 0.003           | 0.619[0.588, 0.650] | 1.924(1.058-3.500)   | 0.032           | 34976055 |
| Liu-W signature     | 0.584   | 0.663   | 0.688   | 0.046           | 0.546[0.519, 0.573] | 2.534(0.912-7.039)   | 0.075           | 36180848 |
| Shi-XB signature    | 0.603   | 0.661   | 0.574   | 0.133           | 0.604[0.574, 0.634] | 1.386(1.130-1.700)   | 0.002           | 35121801 |
| Lian-L signature    | 0.619   | 0.644   | 0.637   | 0.020           | 0.602[0.572, 0.632] | 1.973(1.305-2.982)   | 0.001           | 35557566 |
| Zhang-CQ signature  | 0.583   | 0.636   | 0.658   | 0.029           | 0.577[0.548, 0.606] | 1.952(1.009-3.774)   | 0.047           | 32883946 |
| He-WW signature     | 0.650   | 0.634   | 0.640   | 0.254           | 0.599[0.569, 0.629] | 2.367(1.389-4.036)   | 0.002           | 31423201 |
| Xie-JH signature    | 0.528   | 0.628   | 0.741   | 0.241           | 0.531[0.504, 0.558] | 1.512(1.123-2.036)   | 0.006           | 35282133 |
| Xiao-WY signature   | 0.522   | 0.625   | 0.666   | 0.141           | 0.545[0.518, 0.572] | 2.618(1.104-6.206)   | 0.029           | 35789548 |
| Lan-T signature     | 0.583   | 0.615   | 0.694   | 0.444           | 0.565[0.537, 0.593] | 2.456(1.180-5.112)   | 0.016           | 31966072 |
| Chen-FN signature   | 0.558   | 0.613   | 0.703   | 0.020           | 0.566[0.538, 0.594] | 1.939(1.247-3.013)   | 0.003           | 35611939 |
| Zheng-ZJ signature  | 0.526   | 0.611   | 0.467   | 0.193           | 0.552[0.524, 0.580] | 1.456(1.115-1.902)   | 0.006           | 35432441 |
| Song-KW signature   | 0.566   | 0.606   | 0.730   | 0.048           | 0.560[0.532, 0.588] | 2.038(1.172-3.544)   | 0.012           | 36072903 |
| Zhang-CQ signature  | 0.581   | 0.599   | 0.602   | 0.203           | 0.558[0.530, 0.586] | 2.753(0.776-9.763)   | 0.117           | 32898328 |
| Sun-K signature     | 0.559   | 0.599   | 0.534   | 0.632           | 0.555[0.527, 0.583] | 2.407(0.874-6.632)   | 0.089           | 35840882 |
| He-ZK signature     | 0.598   | 0.594   | 0.693   | 0.121           | 0.596[0.566, 0.626] | 2.523(1.126-5.650)   | 0.025           | 35574385 |
| Cui-HY signature    | 0.531   | 0.593   | 0.562   | 0.218           | 0.524[0.498, 0.550] | 2.801(0.353-22.198)  | 0.329           | 34336650 |
| Zhao-FC signature   | 0.684   | 0.592   | 0.609   | 0.160           | 0.616[0.585, 0.647] | 2.486(1.469-4.205)   | <0.001          | 35912250 |
| Liu-Y signature     | 0.608   | 0.592   | 0.522   | 0.120           | 0.596[0.566, 0.626] | 2.499(1.449-4.310)   | <0.001          | 32133283 |
| Zhang-JF signature  | 0.606   | 0.589   | 0.535   | 0.223           | 0.587[0.558, 0.616] | 1.947(1.398-2.711)   | <0.001          | 35578166 |
| Wu-D signature      | 0.682   | 0.583   | 0.579   | 0.113           | 0.604[0.574, 0.634] | 2.242(1.100-4.567)   | 0.026           | 34170806 |
| Peng-L signature    | 0.524   | 0.577   | 0.619   | 0.892           | 0.510[0.485, 0.536] | 2.605(0.436-15.564)  | 0.294           | 31815134 |
| Feng signature      | 0.608   | 0.568   | 0.598   | 0.630           | 0.577[0.548, 0.606] | 1.506(1.199-1.892)   | <0.001          | 34404882 |
| Zhao-MN signature   | 0.573   | 0.568   | 0.571   | 0.313           | 0.574[0.545, 0.603] | 2.435(0.826-7.174)   | 0.106           | 35899307 |
| Xu-T signature      | 0.504   | 0.561   | 0.746   | 0.447           | 0.501[0.476, 0.526] | 2.359(0.524-10.628)  | 0.264           | 35116551 |
| Zhu-T signature     | 0.524   | 0.558   | 0.480   | 0.336           | 0.542[0.515, 0.569] | 2.468(0.839-7.263)   | 0.101           | 33748133 |
| Pang-JJ signature   | 0.671   | 0.554   | 0.730   | 0.049           | 0.629[0.598, 0.660] | 2.602(1.168-5.800)   | 0.002           | 34659345 |
| Du-HL signature     | 0.540   | 0.552   | 0.529   | 0.213           | 0.542[0.515, 0.569] | 2.264(0.713-7.192)   | 0.166           | 33708944 |
| Pu-Y signature      | 0.577   | 0.548   | 0.497   | 0.221           | 0.573[0.544, 0.602] | 2.200(0.673-7.190)   | 0.192           | 35284129 |
| Chen-YH signature   | 0.586   | 0.545   | 0.535   | 0.238           | 0.550[0.523, 0.578] | 2.199(1.024-4.721)   | 0.043           | 33960364 |
| Zhang-HP signature  | 0.622   | 0.537   | 0.561   | 0.485           | 0.579[0.550, 0.608] | 1.782(1.111-2.859)   | 0.017           | 34234806 |
| Chen-FF signature   | 0.511   | 0.528   | 0.492   | 0.639           | 0.504[0.479, 0.529] | 2.442(0.362-16.458)  | 0.359           | 35928921 |
| Meng-J signature    | 0.620   | 0.524   | 0.469   | 0.179           | 0.594[0.564, 0.624] | 2.782(1.202-6.440)   | 0.017           | 29160958 |
| Zhang-WG signature  | 0.473   | 0.523   | 0.691   | 0.731           | 0.468[0.445, 0.491] | 2.514(0.378-16.734)  | 0.341           | 36071753 |
| Tan-LL signature    | 0.546   | 0.489   | 0.465   | 0.494           | 0.560[0.532, 0.588] | 2.135(0.935-4.876)   | 0.072           | 34814273 |
| Lu-T signature      | 0.523   | 0.464   | 0.348   | 0.514           | 0.595[0.565, 0.625] | 2.193(0.591-8.144)   | 0.241           | 33981829 |
| Gao-JY signature    | 0.534   | 0.455   | 0.360   | 0.937           | 0.536[0.509, 0.563] | 2.349(0.243-22.697)  | 0.460           | 33718151 |
| Zhang-CQ signature  | 0.614   | 0.451   | 0.424   | 0.304           | 0.576[0.547, 0.605] | 2.335(0.947-5.754)   | 0.065           | 33392181 |
| Zhang-CQ signature  | 0.544   | 0.408   | 0.302   | 0.695           | 0.547[0.520, 0.574] | 3.217(0.038-269.472) | 0.605           | 35224157 |

**Supplementary Table 7. Top 20 categories with their representative enriched terms (one per category).**

| GO            | Category                | Description                                                | Count | %     | Log10(P) | Log10(q) |
|---------------|-------------------------|------------------------------------------------------------|-------|-------|----------|----------|
| hsa04217      | KEGG Pathway            | Necroptosis                                                | 27    | 100   | -62.53   | -58.18   |
| hsa05164      | KEGG Pathway            | Influenza A                                                | 12    | 44.44 | -19.92   | -15.88   |
| WP4630        | WikiPathways            | Measles virus infection                                    | 8     | 29.63 | -12.55   | -8.89    |
| R-HSA-9645723 | Reactome Gene Sets      | Diseases of programmed cell death                          | 7     | 25.93 | -11.37   | -7.98    |
| R-HSA-5218859 | Reactome Gene Sets      | Regulated Necrosis                                         | 6     | 22.22 | -10.86   | -7.52    |
| hsa04621      | KEGG Pathway            | NOD-like receptor signaling pathway                        | 7     | 25.93 | -9.62    | -6.61    |
| GO:0009615    | GO Biological Processes | response to virus                                          | 8     | 29.63 | -9.13    | -6.25    |
| GO:0070663    | GO Biological Processes | regulation of leukocyte proliferation                      | 7     | 25.93 | -8.51    | -5.76    |
| GO:0000302    | GO Biological Processes | response to reactive oxygen species                        | 6     | 22.22 | -8.08    | -5.41    |
| GO:0043124    | GO Biological Processes | negative regulation of I-kappaB kinase/NF-kappaB signaling | 4     | 14.81 | -6.91    | -4.49    |
| R-HSA-1280215 | Reactome Gene Sets      | Cytokine Signaling in Immune system                        | 8     | 29.63 | -6.78    | -4.38    |
| GO:0002260    | GO Biological Processes | lymphocyte homeostasis                                     | 4     | 14.81 | -6.48    | -4.16    |
| GO:0080135    | GO Biological Processes | regulation of cellular response to stress                  | 7     | 25.93 | -5.58    | -3.52    |
| GO:0038034    | GO Biological Processes | signal transduction in absence of ligand                   | 3     | 11.11 | -5.47    | -3.44    |
| WP5083        | WikiPathways            | Neuroinflammation and glutamatergic signaling              | 4     | 14.81 | -5.14    | -3.17    |
| GO:0001933    | GO Biological Processes | negative regulation of protein phosphorylation             | 5     | 18.52 | -4.93    | -2.99    |
| GO:0009612    | GO Biological Processes | response to mechanical stimulus                            | 4     | 14.81 | -4.41    | -2.54    |
| WP2037        | WikiPathways            | Prolactin signaling pathway                                | 3     | 11.11 | -4.37    | -2.51    |
| GO:1901216    | GO Biological Processes | positive regulation of neuron death                        | 3     | 11.11 | -4.12    | -2.29    |
| GO:0071496    | GO Biological Processes | cellular response to external stimulus                     | 4     | 14.81 | -3.76    | -1.97    |
